# Supplementary material
Source: Springer Nature journal article supplement (https://www.springermedizin.de/resource/supplementary/12888_2012_1373_MOESM3_ESM.pdf/9480048)

### Intention-to-treat analysis

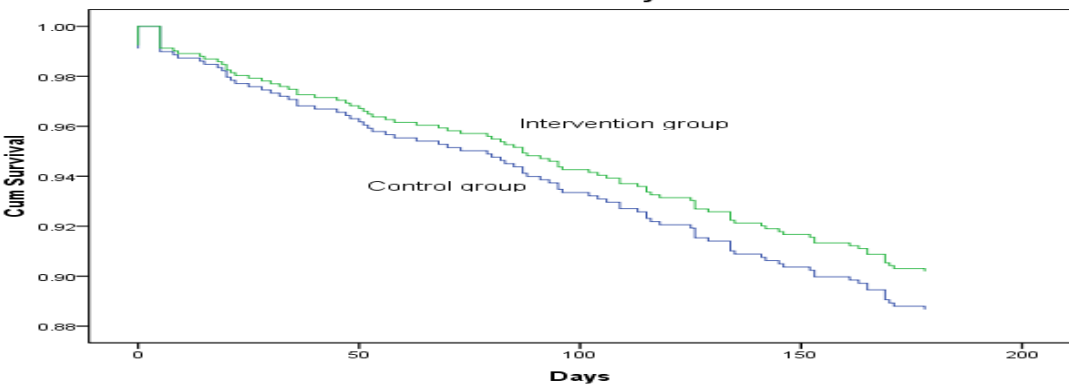

### Per-protocol analysis

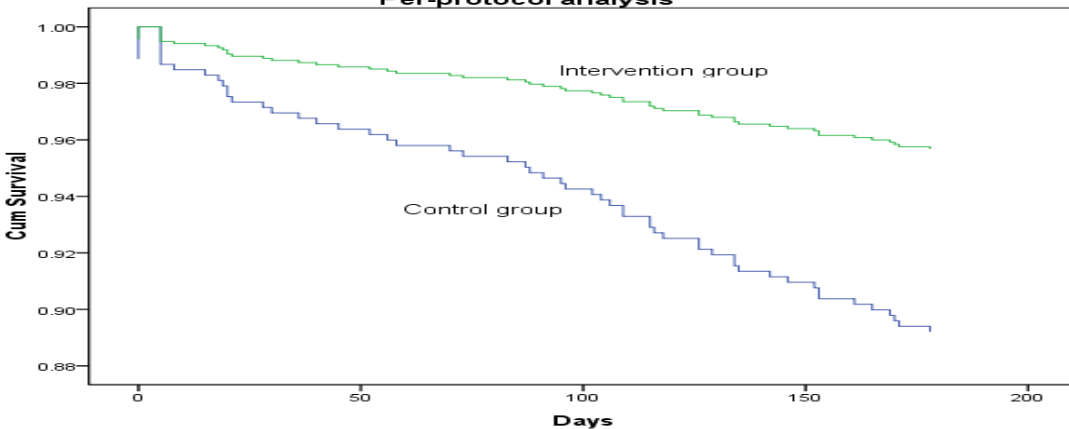

Supplement: MOESM3 [file 9480048]
